# Supplementary material for: Over-the-counter short-acting β2-agonist purchase and asthma-related health outcomes: a post hoc analysis of the SABINA III study
Source: PubMed Central journal article supplement — NPJ Prim Care Respir Med. 2024 Nov 1;34:34. doi: 10.1038/s41533-024-00397-4 (PMC11530521; doi:10.1038/s41533-024-00397-4), 2024-11-01
Supplement: 41533_2024_397_MOESM3_ESM.pdf [file 41533_2024_397_MOESM3_ESM.pdf]

## **SUPPLEMENTARY MATERIAL**

**Over-the-counter short-acting  $\beta_2$ -agonist purchase and asthma-related health outcomes:**

**A post hoc analysis of the SABINA III study**

**Supplementary Figure 1. Percentage of patients reporting SABA OTC purchase across the participating SABINA III countries**

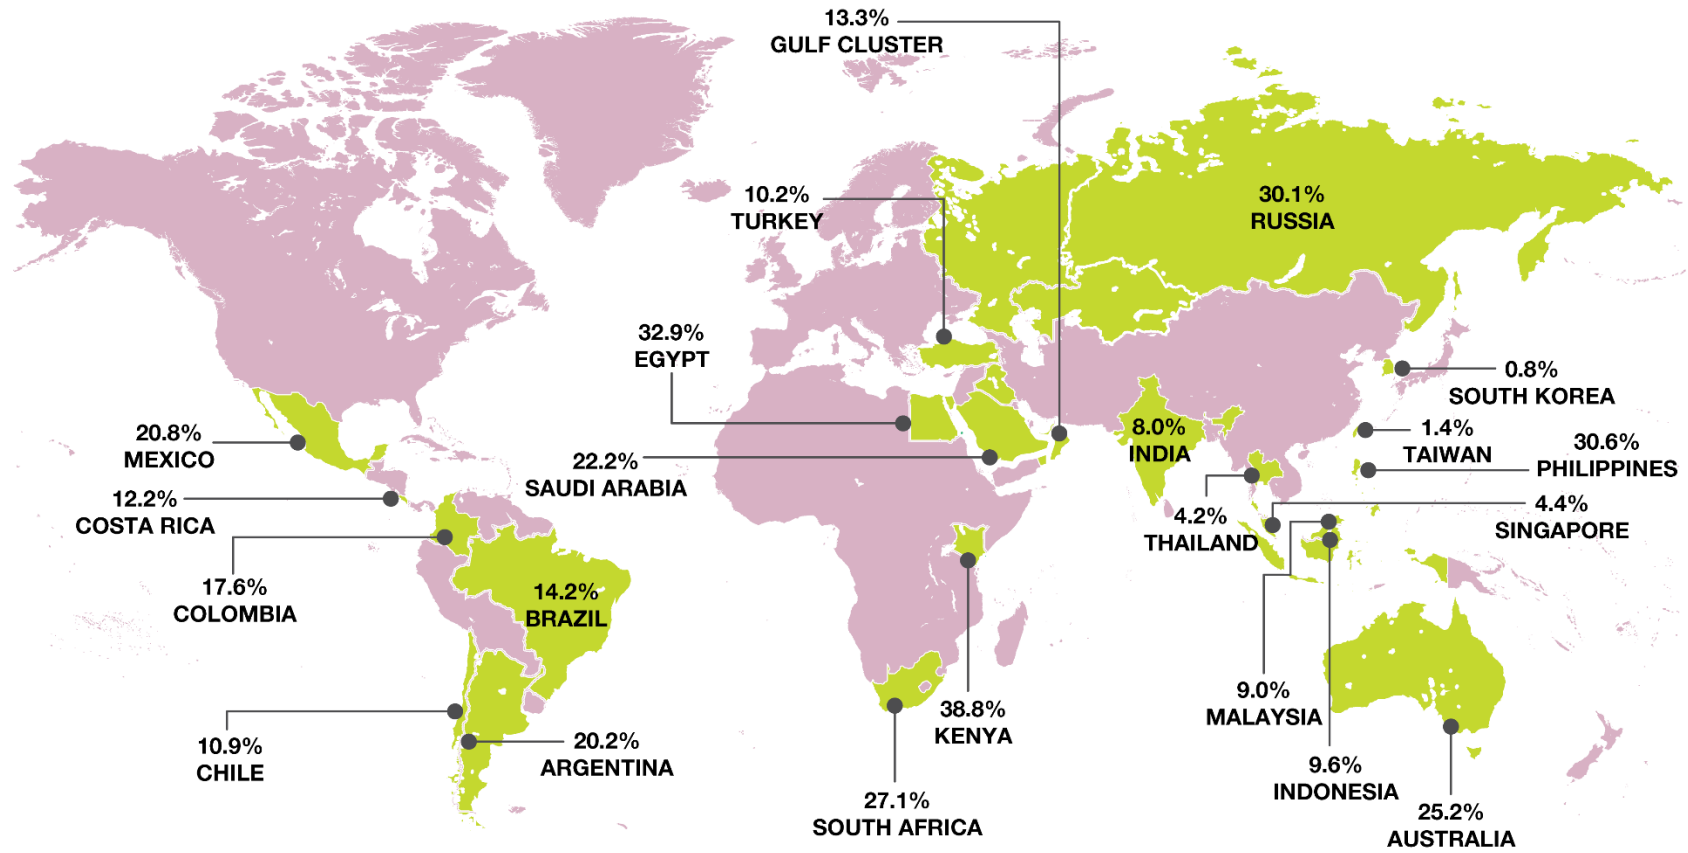

OTC, over-the-counter; SABA, short-acting  $\beta_2$ -agonist; SABINA, SABA use IN Asthma.

**Supplementary Figure 2. Patients from the SABINA III study included in the analysis to determine the association of SABA prescriptions and SABA OTC purchase (1–2 vs  $\geq 3$  SABA prescriptions [both with and without SABA OTC purchase]) with asthma-related health outcomes**

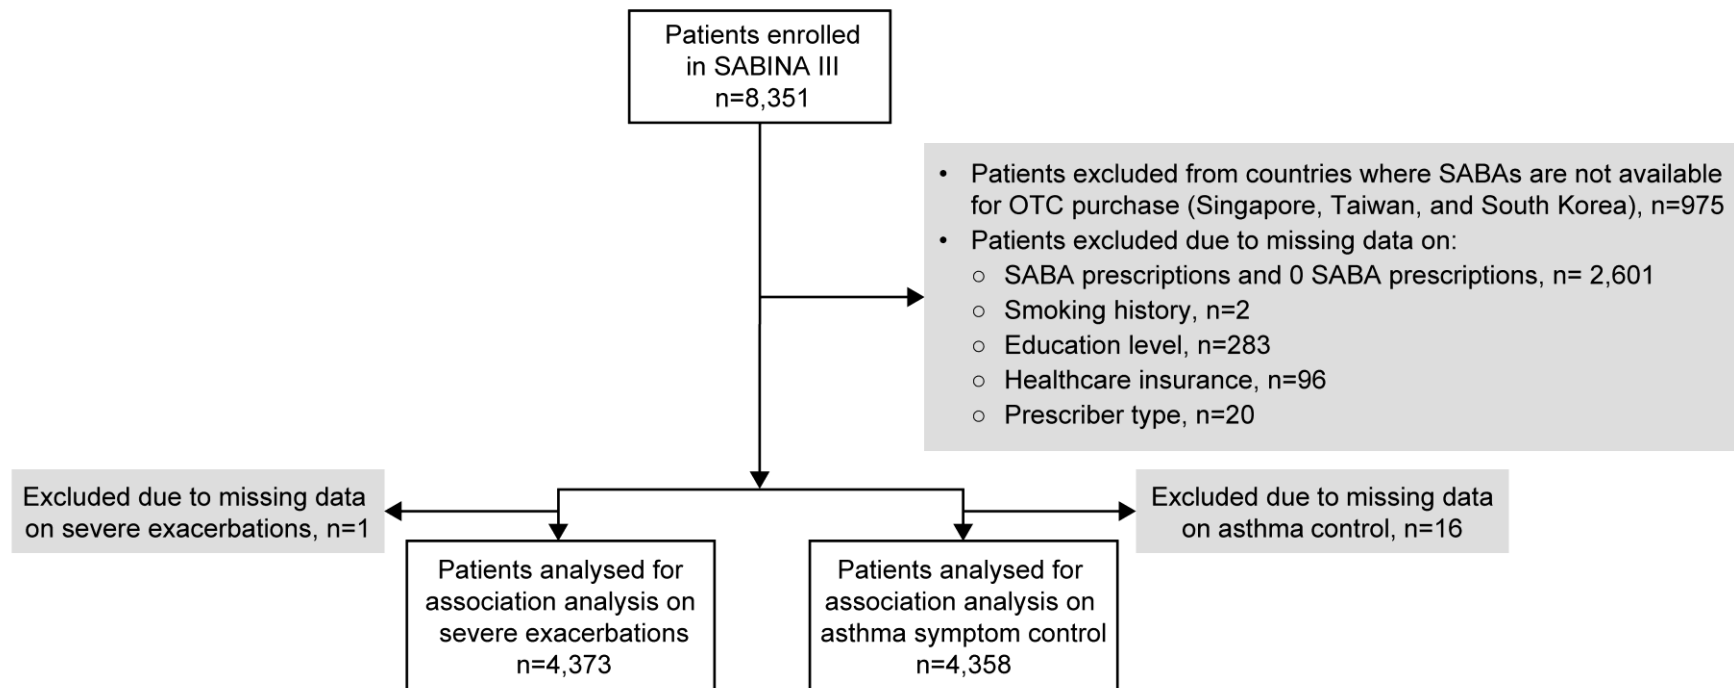

OTC, over-the-counter; SABA, short-acting  $\beta_2$ -agonist; SABINA, SABA use IN Asthma.

**Supplementary Figure 3. Patients from the SABINA III study included in the analysis to determine the association of SABA prescriptions and SABA OTC purchase (1–2 vs  $\geq 3$  SABA prescriptions [both without SABA OTC purchase]) with asthma-related health outcomes**

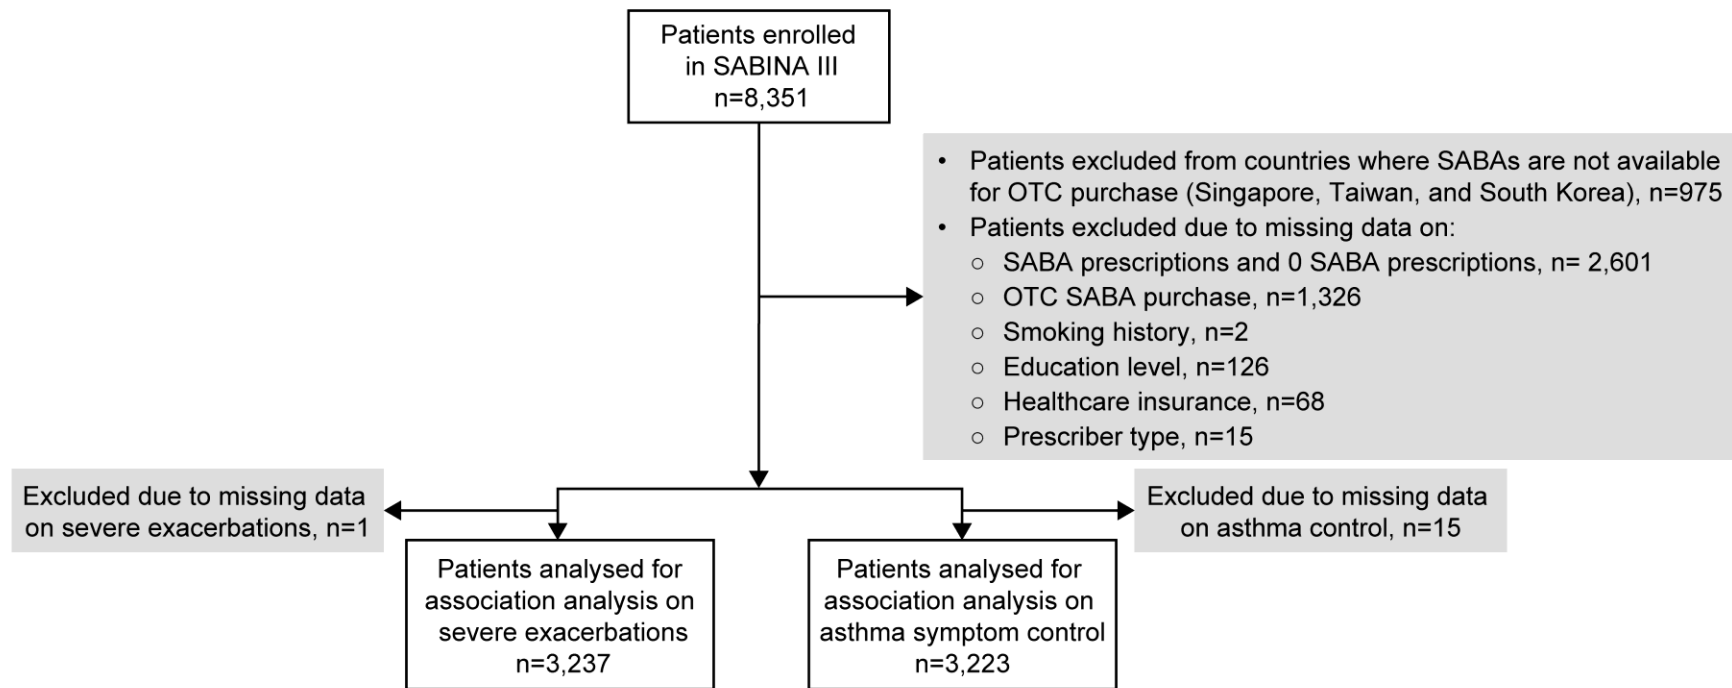

OTC, over-the-counter; SABA, short-acting  $\beta_2$ -agonist; SABINA, SABA use IN Asthma.

**Supplementary Figure 4. Patients from the SABINA III study included in the analysis to determine the association of SABA prescriptions and SABA OTC purchase (1–2 vs  $\geq 3$  SABA prescriptions [both with  $\geq 1$  SABA OTC purchase]) with asthma-related health outcomes**

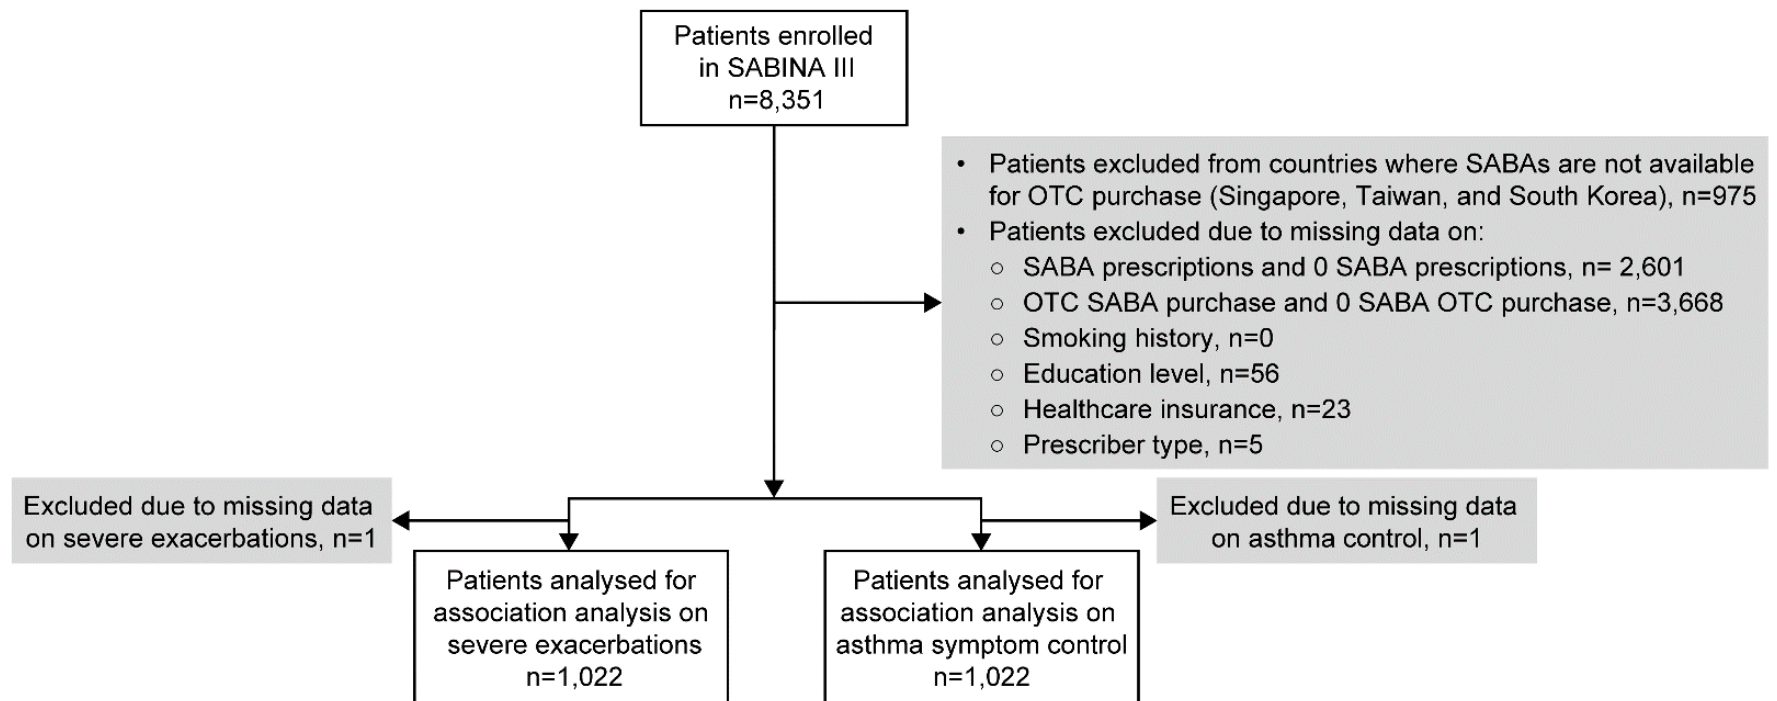

OTC, over-the-counter; SABA, short-acting  $\beta_2$ -agonist; SABINA, SABA use IN Asthma.

**Supplementary Figure 5. Patients from the SABINA III study included in the analysis to determine the association of SABA prescriptions and SABA OTC purchase (1–2 SABA prescriptions [without SABA OTC purchase] vs  $\geq 3$  SABA prescriptions [with  $\geq 1$  SABA OTC purchase]) with asthma-related health outcomes**

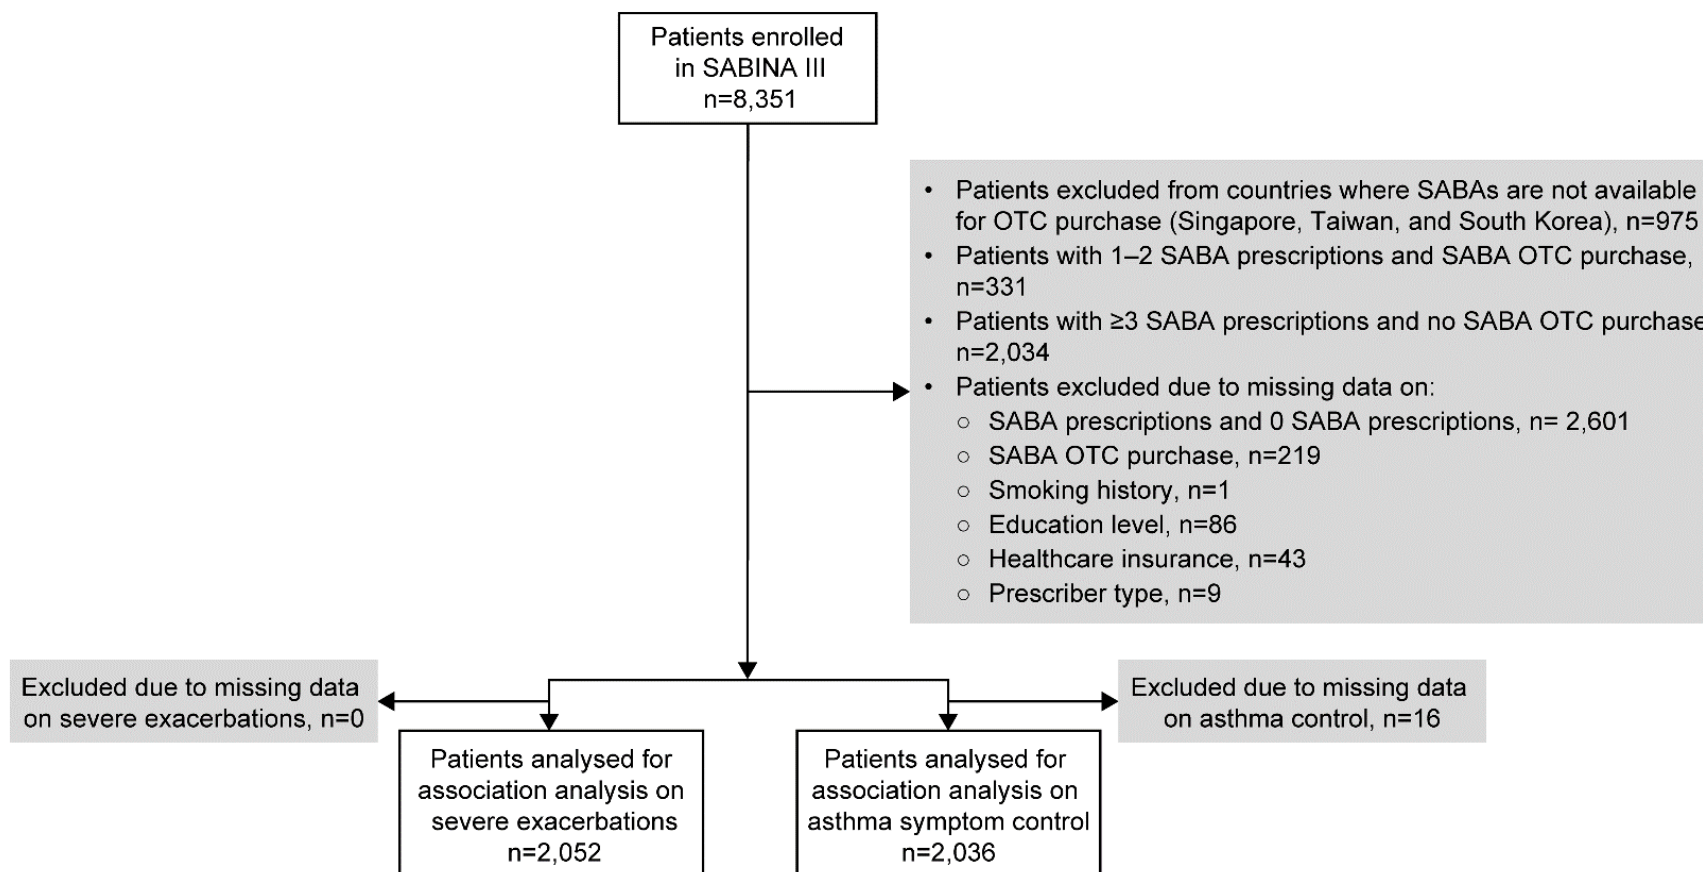

OTC, over-the-counter; SABA, short-acting  $\beta_2$ -agonist; SABINA, SABA use IN Asthma.
